# Supplementary material
Source: PubMed Central journal article supplement (PMC10619480)
Supplement: NIHMS1938201-supplement-1.pdf [file NIHMS1938201-supplement-1.pdf]

Results, including schematics and pictures of microfluidic trapping chambers (PDF)

Results, including movie of array loading with *C. elegans* embryos (mp4)

## ASSOCIATED CONTENT

### Supporting Information

The Supporting Information is available free of charge on the ACS Publications website.
